# Supplementary material
Source: publisher figshare collection journal article supplement (https://karger.figshare.com/articles/dataset/_/5121742)
Supplement: Supplementary file 1 [file 1]

Archive with 3 entries (3 files):
- 000324683_sm_Figures.pdf
- 000324683_sm_Suppl._Material.pdf
- 000324683_sm_Table S1.pdf
