# Supplementary material
Source: publisher figshare collection journal article supplement (https://karger.figshare.com/articles/dataset/_/5121742)

Fig. S1.

The relationship between positive predicted rate and reproducibility rate in duplicate samples

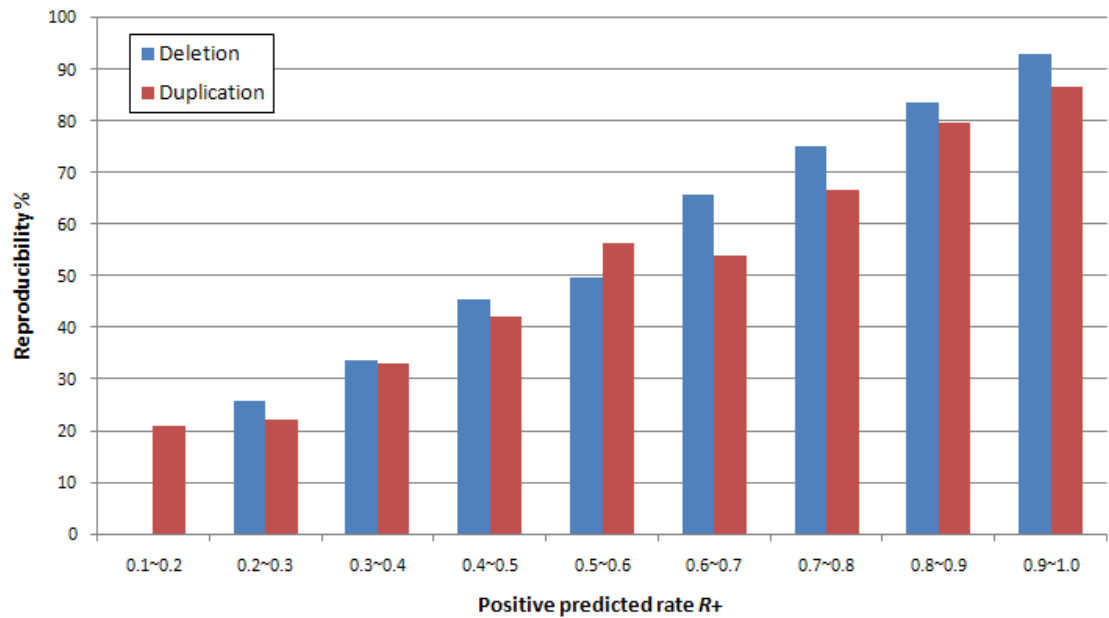

Fig. S2.

The positive predicted rate is stable across many replications. We randomly selected 90% of replicate pairs, and randomly assigned status as discovery or replication, and then we calculated the positive predicted rate for “any 1 of 3 programs” method. We repeated the process 100 times. The positive predicted rate fluctuates in a narrow range for duplications (A) and deletions (B).

A

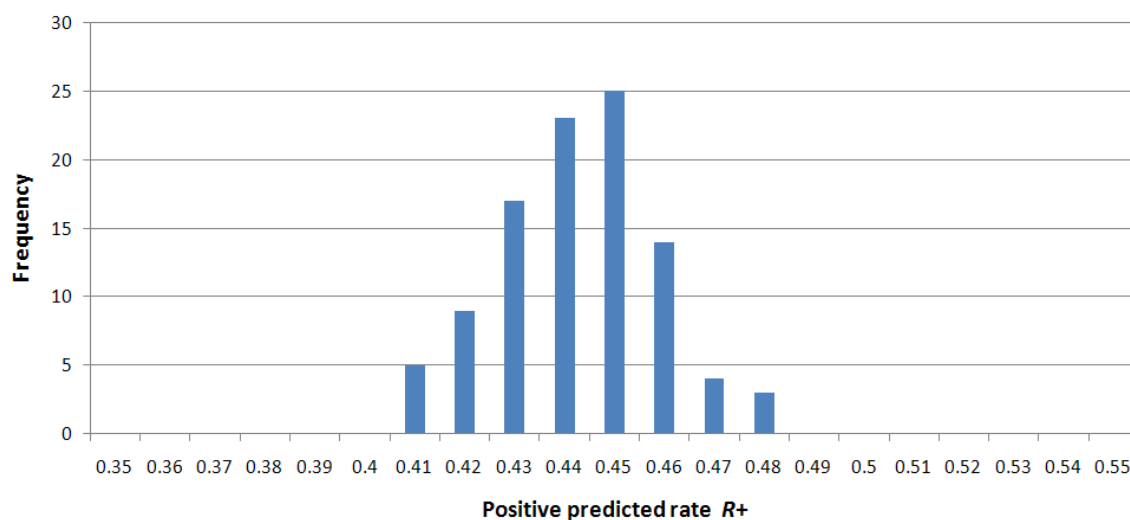

B

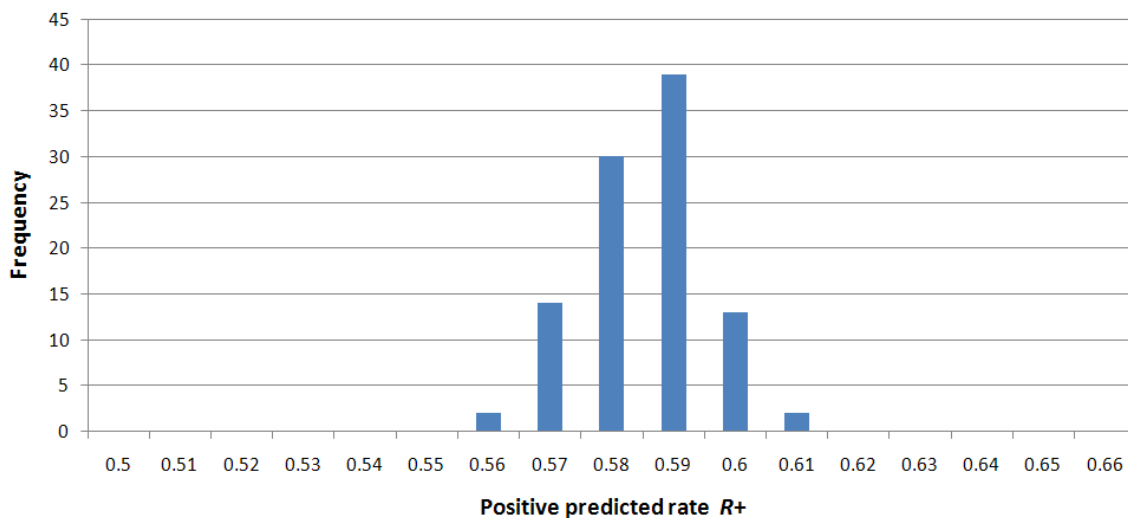

Supplement: Supplementary file 1 [file 1 › 000324683_sm_Figures.pdf]
