# Supplementary material
Source: publisher figshare collection journal article supplement (https://karger.figshare.com/articles/dataset/_/5121742)
Supplement: Supplementary file 1 [file 1 › 000324683_sm_Suppl._Material.pdf]

## Supplementary materials

### CNV calling

CNVs were called by CNVPartition v1.2.1, which is a plug-in for the Illumina BeadStudio Module. For PennCNV and QuantiSNP v1.1, the recommended settings were used to call CNVs, and implemented wave adjustment procedure was used to adjust genomic waves. QuantiSNP v1.1 provided support for non-polymorphic copy number probes. We removed all CNVs called by QuantiSNP if their Log Bayes Factor (LBF) was less than 10, as recommended by QuantiSNP.

PennCNV reports log R ratio standard deviation (LRR\_SD), B allele frequency drift (BAF\_Drift) and waviness factor (WF) for quality control. We used the following criteria to look for good samples (<http://www.yale.edu/state/Pipeline.htm>).

1.  $LRR\_SD < 0.28$
2.  $BAF\_Drift < 0.01$
3.  $WF > -0.05$  and  $< 0.05$

If a subject satisfied these criteria, it was considered a sample with good quality.

Similarly, QuantiSNP reports B allele frequency outliers (BAFout), LogR standard outliers (LogRout), B allele frequency standard deviation (BAFstd) and LogR standard deviation (LogRstd) for each chromosome. The following criteria were used to determine good quality.

1.  $BAFout \leq 0.1$
2.  $LogRout \leq 0.1$
3.  $BAFstd \leq 0.2$
4.  $LogRstd \leq 0.4$

For any subject, if one or more autosomal chromosomes did not satisfy these criteria, the sample was considered poor quality.

In order to pass quality control, a sample and its replication had to be considered as good quality by both PennCNV and QuantiSNP. After quality control, 96 subjects and their replication data passed the filter. CNVpartition does not provide any quality control information for individual subjects.

In these samples, we identified 2348 potential regions across the genome for deletions and 851 potential regions for duplications. For any particular potential region, at least one of these 96 subjects had a duplication or deletion in this region. We restricted our study to only these potential regions.

### Theoretical Model

The model is derived from our previous work on psychiatric disorder diagnoses [1,2]. For some psychiatric disorders, the symptoms are not stable, and similar to CNV calling, the diagnoses may not be accurate. Whether a positive diagnosis at time point 1 can be confirmed at time point 2 is determined by sensitivity and specificity. And this information can be used to estimate sensitivity and specificity *per se*. Similarly in this study, we used the result of CNV calling from replication samples to estimate sensitivity and specificity. We realized that testing the validity of each CNV is unfeasible on a genome wide scale. We therefore constructed a mathematical model to estimate the probability of being true at a larger scale.

For the mathematical model, we defined the reproducibility as being reproduced by any of the three algorithms; however, there are arguably several valid ways to do this. Some may require a region shared by one, two, and all of the three algorithms. We decided to calculate the maximum coverage of all available algorithms: it could be a direct report if only one algorithm was available, maximum coverage of two if two were available and maximum coverage of three if three were available. Then we tested whether the shared region of the maximum coverage was over 30% of the total coverage. We chose this approach because: 1. this issue is overcomplicated and needs to be simplified, and 2. the boundary of CNV is hard to define, thus any report may be treated as evidence of a CNV.

We modeled the positive predicted rate for duplication and deletion separately. We let  $T$  denote true state and  $O_i$  denote observed state, at time  $i$  ( $i=1,2$ ).  $T$  and  $O_i$  take the value 1 for “presence” and 0 for “absence” of CNVs (duplications or deletions). The sensitivity  $p$  and specificity  $q$  are

$$p = \Pr(O_i = 1 | T = 1)$$

$$q = \Pr(O_i = 0 | T = 0)$$

Each CNV calling program typically reports a value for calling confidence. Let  $Z$  denote a set of CNV characteristics, including percentile distribution of confidence scores from each program and the number of programs that report a CNV at a particular CNV segment. Let  $k$  denote the true base rate at this region. Therefore, we have

$$k = \Pr(T = 1)$$

Then the probability of observing a CNV (duplication or deletion) at evaluation  $i$  is given by

$$(1) \quad P_+ = \Pr(O_i = 1 | Z) = pk + (1 - q)(1 - k)$$

Similarly, the probability of observing a case at the second time, conditional on observing a case at the first time at condition  $Z$  is

$$(2) \quad \Pr(O_2 = 1 | O_1 = 1, Z) = p \Pr(T = 1 | O_1 = 1, Z) + (1 - q)(1 - \Pr(T = 1 | O_1 = 1, Z))$$

In order to estimate theoretical sensitivity for this model, we used the following methodology. At time 2, the probability of confirming a true positive which is discovered at time 1 (i.e. identifying a CNV in the second replicate, given that it is true and it was seen in the first replicate) is the theoretical sensitivity of this model. Let  $Z_{max}$  denote the theoretical condition for which all three CNV estimation programs asymptotically reach the maximum value for prediction of a CNV. Then, we make the assumption that if a CNV is identified ( $O_1=1$ ) with the theoretical maximum values of the three programs ( $Z_{max}$ ), then the CNV is a true positive ( $T=1$ ):

$$\Pr(T = 1 | O_1 = 1, Z_{max}) = 1$$

This is a theoretical situation. Because we used percentile distributions of confidence scores,  $Z_{max}$  should be 100 for each confidence score, and 3 for the consistence rate, which are the theoretical maximum values that  $Z_{max}$  can reach. Combining  $\Pr(T = 1 | O_1 = 1, Z_{max}) = 1$  with Function (2), we have:

$$p = \Pr(O_2 = 1 | O_1 = 1, Z_{max})$$

where  $p$  is the theoretical sensitivity of our mathematical model. The value of  $\Pr(O_2 = 1 | O_1 = 1, Z)$  can be modeled by a logistic regression model because  $O_2$ ,  $O_1$ , and  $Z$  are all observed values:

$$\Pr(O_2 = 1 | O_1 = 1, Z) = 1 / [1 + \exp(-\alpha - \beta Z)]$$

The percentile of confidence scores from CNVpartition, PennCNV and QuantiSNP, as well as the consistency rate, were all significant for duplications or deletions. Based on the logistic regression and the formula  $p = \Pr(O_2 = 1 | O_1 = 1, Z_{\max})$ , we estimated that the theoretical sensitivity is 0.91 for duplications, and 0.97 for deletions. This is the theoretical sensitivity for the mathematical model, and should be distinguished from the sensitivity  $p'$  for each subcategory. We also wanted to point out that these regions are restricted to 851 potential regions for duplications and 2,348 potential regions for deletions.

We have duplicate samples. The probability of observing a CNV (duplication or deletion) at both times is given by

$$(3) \quad P_{++} = \Pr(O_2 = 1, O_1 = 1 | Z_1, Z_2) = p^2k + (1-q)^2(1-k)$$

Now,  $q$  can be solved by combining function (1) and (3),

$$q = \frac{p + P_{++} - P_+ - pP_+}{p - P_+}$$

From this formula, we also can estimate that the theoretical specificity, which is 0.986 for duplications and 0.989 for deletions.

For each CNV, by solving function (2), we can obtain the positive predicted rate  $R_+$ , which is the probability of being a CNV, conditioned on being positive at time 1.

$$R_+ = \Pr(T = 1 | O_1 = 1, Z) = [\Pr(O_2 = 1 | O_1 = 1, Z) + q - 1] / (p + q - 1)$$

$R_+$  was calculated for all CNVs, and we took the mean value of  $R_+$  of CNVs within each category. This is the positive predicted rate for each subcategory reported in Tables 2-4 & S1. And this value is later used to calculate the sensitivity for each subcategory as described below. We assume  $p'$ ,  $q'$  are the sensitivity and specificity within each subcategory, respectively, and  $k$  is the true base rate. We have

$$(4) \quad p' = \frac{P_+}{k} R_+$$

Functions (1), (3) and (4) together only have 3 unknown variables:  $k$ ,  $p'$  and  $q$ .  $P_+$  and  $P_{++}$  can be obtained from the data directly. By solving functions (1), (3) and (4), we can obtain the following formula for  $p'$ .

$$ap'^2 + bp' + c = 0$$

Among them,

$$a = P_+ R_+, \quad b = (P_+ - P_+ R_+)^2 - P_{++} - P_+^2 R_+^2, \quad c = P_+ R_+ P_{++}$$

Finally,

$$p' = \frac{-b \pm \sqrt{b^2 - 4ac}}{2a}$$

The negative root is ignored because it is out of boundary.

Given that  $p'$  can be calculated from the function above, and both  $P_+$  and  $R_+$  are available, we can also estimate the base rate  $k$  by solving function (4). Therefore, we have

$$k = \frac{P_+}{p'} R_+$$

When all CNV callings are considered, the base rate  $k$  is 0.016 for deletions and 0.012 for duplications.

#### Model validation

In calculating the positive predicted rate  $R_+$ , we assumed that  $\Pr(T = 1 | O_1 = 1, Z_{\max}) = 1$ , i.e., a theoretical CNV is true if three programs simultaneously report the highest confidence scores. This assumption is only used to estimate the theoretical sensitivity of our mathematical model.  $Z_{\max}$  is the characteristic from a theoretical CNV that has the highest confidence score and is confirmed by all three programs. Because we used percentile distributions, the vector of  $Z_{\max}$  includes 100 for each confidence score and 3 for the consistence rate. For a theoretical CNV like this, our mathematical model can only capture part of it; therefore probability is the theoretical sensitivity of our mathematical model. This theoretical CNV does not exist in reality. We can only test some CNVs with weaker characteristics. Our rationale is that if a CNV with slightly weaker characteristics can meet the requirement, a theoretical CNV with perfect characteristics can meet the requirement as well. We tested CNVs with weaker characteristics on Chr 14 by qPCR. Among them, 48 subjects have CNVs with  $R_+$  more than 0.91, with the average as high as 0.98. The qPCR experiment confirmed that all 48 subjects were reported as having the CNVs and 0 were false positive.

## Reference

1. Rice JP, McDonald-Scott P, Endicott J, Coryell W, Grove WM, et al. (1986) The stability of diagnosis with an application to bipolar II disorder. *Psychiatry Res* 19: 285-296.
2. Rice JP, Rochberg N, Endicott J, Lavori PW, Miller C (1992) Stability of psychiatric diagnoses. An application to the affective disorders. *Arch Gen Psychiatry* 49: 824-830.
