# Supplementary material
Source: publisher figshare collection journal article supplement (https://karger.figshare.com/articles/dataset/_/5121742)
Supplement: Supplementary file 1 [file 1 › 000324683_sm_Table S1.pdf]

Table S1. The positive predicted rate  $R_+$  within subcategories defined by size

|                        | Duplication |            |             |            |            | Deletion   |             |             |            |            |
|------------------------|-------------|------------|-------------|------------|------------|------------|-------------|-------------|------------|------------|
| Size                   | <1kb        | 1-10kb     | 10-100kb    | 100-500kb  | ≥500kb     | <1kb       | 1-10kb      | 10-100kb    | 100-500kb  | ≥500kb     |
| <b>CNVPartition</b>    | 0.46 (4)    | 0.54 (75)  | 0.68 (360)  | 0.72 (300) | 0.77 (120) | 0.63 (57)  | 0.72 (784)  | 0.80 (1115) | 0.85 (255) | 0.88 (64)  |
| <b>PennCNV</b>         | 0.26 (39)   | 0.31 (428) | 0.43 (1076) | 0.60 (478) | 0.78 (79)  | 0.51 (191) | 0.60 (2229) | 0.69 (2091) | 0.86 (342) | 0.97 (29)  |
| <b>QuantiSNP</b>       | 0.30 (8)    | 0.47 (91)  | 0.57 (515)  | 0.60 (442) | 0.64 (161) | 0.41 (305) | 0.68 (1505) | 0.74 (1745) | 0.67 (623) | 0.69 (141) |
| <b>3 of 3 programs</b> | 0.58 (3)    | 0.69 (56)  | 0.77 (322)  | 0.78 (311) | 0.83 (114) | 0.80 (47)  | 0.84 (690)  | 0.90 (1075) | 0.93 (304) | 0.94 (79)  |

The total number of CNVs is indicated in parentheses. In calculating the total number of CNVs, we included a CNV for a certain category if the report from any one of the specified programs' satisfied this category.
